1 **TITLE:** Comprehensive antibiotic-linked mutation assessment by Resistance Mutation  
2 Sequencing (RM-seq)

3

4 **SHORT TITLE:** Comprehensive characterisation of mutational antibiotic resistance

5

6 Romain Guérillot<sup>1</sup>, Lucy Li<sup>1</sup>, Sarah Baines<sup>1</sup>, Brian O. Howden<sup>1</sup>, Mark B. Schultz<sup>1,2,3</sup>, Torsten  
7 Seemann<sup>4,2</sup>, Ian Monk<sup>1</sup>, Sacha J. Pidot<sup>1</sup>, Wei Gao<sup>1</sup>, Stefano Giulieri<sup>1</sup>, Anders Gonçalves da Silva<sup>1,  
8 2,3</sup>, Anthony D'Agata<sup>3</sup>, Takehiro Tomita<sup>3</sup>, Anton Y. Peleg<sup>5,6</sup>, Timothy P. Stinear<sup>1,2†\*</sup>, Benjamin P.  
9 Howden<sup>1,2,3,7†\*</sup>

10

11 <sup>1</sup> Department of Microbiology and Immunology, The University of Melbourne at the Doherty  
12 Institute for Infection & Immunity, Melbourne, Victoria, Australia.

13 <sup>2</sup> Doherty Applied Microbial Genomics, The University of Melbourne at the Peter Doherty  
14 Institute for Infection & Immunity, Melbourne, Victoria, Australia.

15 <sup>3</sup> Microbiological Diagnostic Unit Public Health Laboratory, The University of Melbourne at the  
16 Peter Doherty Institute for Infection & Immunity, Melbourne, Victoria, Australia.

17 <sup>4</sup> Melbourne Bioinformatics, The University of Melbourne, Victoria, Australia.

18 <sup>5</sup> Department of Infectious Diseases, The Alfred Hospital and Central Clinical School, Monash  
19 University, Victoria, Australia.

20 <sup>6</sup> Infection and Immunity Theme, Monash Biomedicine Discovery Institute, Department of  
21 Microbiology, Monash University, Victoria, Australia.

22 <sup>7</sup> Infectious Diseases Department, Austin Health, Heidelberg, Victoria, Australia.

23

24 \*Corresponding authors:

25 E-mail: [bhowden@unimelb.edu.au](mailto:bhowden@unimelb.edu.au); [tstinear@unimelb.edu.au](mailto:tstinear@unimelb.edu.au)

26 †Timothy P. Stinear and Benjamin P. Howden are joint senior authors and contributed equally  
27 to this work.

28

29 **KEY WORDS:** antibiotic resistance, resistance mutations, deep-sequencing, *Staphylococcus*  
30 *aureus*, *Mycobacterium tuberculosis*, rifampicin, daptomycin

31

## 32 **ABSTRACT**

33 Acquired mutations are a major mechanism of bacterial antibiotic resistance generation and  
34 dissemination, and can arise during treatment of infections. Early detection of sub-populations  
35 of resistant bacteria harbouring defined resistance mutations could prevent inappropriate  
36 antibiotic prescription. Here we present RM-seq, a new amplicon-based DNA sequencing work-  
37 flow based on single molecule barcoding coupled with deep-sequencing that enables the high-  
38 throughput characterisation and sensitive detection of resistance mutations from complex  
39 mixed populations of bacteria. We show that RM-seq reduces both background sequencing  
40 noise and PCR amplification bias and allows highly sensitive identification and accurate  
41 quantification of antibiotic resistant sub-populations, with relative allele frequencies as low as  
42  $10^{-4}$ . We applied RM-seq to identify and quantify rifampicin resistance mutations in  
43 *Staphylococcus aureus* using pools of 10,000 *in vitro* selected clones and identified a large  
44 number of previously unknown resistance-associated mutations. Targeted mutagenesis and  
45 phenotypic resistance testing was used to validate the technique and demonstrate that RM-seq  
46 can be used to link subsets of mutations with clinical resistance breakpoints at high-throughput  
47 using large pools of *in vitro* selected resistant clones. Differential analysis of the abundance of  
48 resistance mutations after a selection bottleneck detected antimicrobial cross-resistance and  
49 collateral sensitivity-conferring mutations. Using a mouse infection model and human clinical  
50 samples, we also demonstrate that RM-seq can be effectively applied *in vivo* to track complex  
51 mixed populations of *S. aureus* and another major human pathogen, *Mycobacterium tuberculosis*  
52 during infections. RM-seq is a powerful new tool to both detect and functionally characterise  
53 mutational antibiotic resistance.

## 54 INTRODUCTION

55 Antimicrobial resistance is on the rise and is responsible for millions of deaths every year  
56 (World Health Organization 2014). Bacterial populations consistently and rapidly overcome the  
57 challenge imposed by the use of a new antibiotic. Their remarkable ability to quickly develop  
58 resistance is due to their capacity to exchange genes and to their high mutation supply rate.  
59 Multi-drug resistant bacteria are therefore becoming increasingly prevalent and Drug  
60 susceptibility testing (DST) is now central to avoid antibiotic misuse and minimise the risk of  
61 inducing the emergence of new resistant clones. Over recent years genomics has become a  
62 powerful tool to understand, combat and control the rise of resistance (Köser et al. 2014;  
63 Schürch and van Schaik 2017). Nevertheless, a precise definition of resistance at the genomic  
64 level is crucial to enable fast, culture independent DST by high-throughput sequencing in the  
65 clinical context and to track and fight the spread and persistence of resistant clones globally  
66 (Van Belkum and Dunne 2013; Schürch and van Schaik 2017).

67

68 The genomic basis of resistance is relatively straightforward to establish for resistance  
69 conferred by acquisition of a specific gene. The repertoire of resistance genes (resistome) is  
70 now well defined and there are several curated databases and software prediction tools for  
71 resistance genes detection (McArthur et al. 2013; de Man and Limbago 2016; Liu and Pop  
72 2009). In contrast, comprehensive lists of mutations that confer antibiotic resistance are  
73 lacking, despite equivalent clinical relevance. Resistance to major classes of antimicrobials  
74 including quinolones, beta-lactams, rifamycins, aminoglycosides, macrolides, sulphonamides,  
75 polymyxins, glycopeptides and lipopeptides can all occur via mutations. In some species such  
76 as *Mycobacterium tuberculosis*, resistance to all therapeutic agents is mediated by  
77 mutations (Smith et al. 2013).

78

79 Resistance mutations can be effectively selected *in vitro*, and so genome sequence comparisons  
80 of resistant clones derived from sensitive ancestral clones after antibiotic exposure have  
81 permitted the identification of numerous resistance-associated mutations (Feng et al. 2009;  
82 Livermore et al. 2015; Chen et al. 2014; Mwangi et al. 2007). From these studies it is apparent  
83 that the mutational landscape for a single antibiotic combination within a specific bacterium  
84 can be broad (Howden et al. 2014; Barbosa et al. 2017; Howden et al. 2010; Händel et al. 2014).  
85 Therefore, standard approaches relying on sequence comparisons of single pairs of isogenic  
86 mutants are not practical to extensively define the mutational resistome.

87  
88 Resistance mutations commonly arise in genes encoding the primary drug target or central  
89 regulatory genes, such as *gyrA*, *parC*, *rpsL*, *gidB*, *rpoB*, *23S rRNA*, *rplC*, *rplD*, and *walkR* (for  
90 quinolone, aminoglycoside, rifampicin, linezolid and glycopeptide resistance) (Hershberg 2017;  
91 Händel et al. 2014). Because of their implications in central cell processes, such as DNA  
92 replication, translation, transcription and cell-wall metabolism regulation, mutations arising in  
93 these genes have been associated with a broad range of pleiotropic effects in addition to the  
94 antibiotic resistance that they cause (Hershberg 2017). An increasing body of literature shows  
95 that antibiotic resistance mutations can lead to broader negative therapeutic consequences  
96 through cross-resistance to other antimicrobials (Rodriguez De Evgrafov et al. 2015; Jugheli et  
97 al. 2009; Sacco et al. 2015), increased biofilm formation (Yu et al. 2005), increased virulence  
98 (Helms et al. 2004; Smani et al. 2012; Beceiro et al. 2013; Gao et al. 2013) and enhanced immune  
99 evasion (Gao et al. 2013; Bæk et al. 2015; Cameron et al. 2011; Miskinyte and Gordo 2013).  
100 However, there is currently no efficient method to identify pleiotropic mutations.  
101 Comprehensively identifying mutations associated with antibiotic cross-resistance and  
102 increased risk of therapeutic failure will provide crucial information for future personalised  
103 medicine and will help to improve therapeutics guidelines through a greater understanding of  
104 the drivers and consequences of mutational resistance. At an epidemiological and evolutionary

105 level, understanding why specific resistance mutations are preferentially selected might  
106 provide a rational basis for development of effective measures to combat the rise of resistance.

107

108 In this study we developed an innovative workflow called Resistance Mutation sequencing (RM-  
109 seq) that enables the unbiased quantification of resistance alleles from complex *in vitro* derived  
110 resistant clone libraries, selectable under any experimental condition, allowing identification  
111 and characterisation of mutational resistance and its consequences. Here we investigated  
112 mutational resistance in *S. aureus* and *M. tuberculosis* and demonstrate that complex resistant  
113 sub-populations can be effectively characterised *in vitro* or detected *in vivo* using RM-seq.

## 114 **RESULTS**

### 115 **The RM-seq workflow.**

116 RM-seq is an amplicon-based, deep-sequencing technique founded on the single molecule  
117 barcoding method (Faith et al. 2013). Here we have adapted this approach in order to identify  
118 and quantify at high-throughput, mutations that confer resistance to a given antibiotic (Faith et  
119 al. 2013; Kivioja et al. 2011). RM-seq can take advantage of the ability of bacteria to quickly  
120 develop resistance *in vitro* to identify and functionally characterise resistance associated  
121 mutations at high-throughput. A large and genetically diverse population of resistant clones  
122 that encompass the mutational landscape of resistance is selected (Fig 1A). In order to  
123 maximise the genetic diversity, a large number of resistant clones (~10,000) are pooled from  
124 multiple independent culture and genomic DNA of the mixed resistant population is extracted  
125 and the mutational repertoire interrogated by amplicon deep-sequencing.

126

127 The high sensitivity and the accurate quantification of the frequency of all the selected  
128 mutations in a given genetic loci, enabled screening of complex, mixed libraries of resistant  
129 clones. In theory, genetic interactions can be tracked and associated with any selectable  
130 pleiotropic phenotype of interest (e.g. cross-resistance to other antimicrobials, immune  
131 evasion) by measuring the relative abundance of resistant clones before and after selection.  
132 Specific mutations that favour the growth or survival under *in vitro* or *in vivo* test condition will  
133 increase in frequency within the population and be readily detected by RM-seq.

134

135 Unbiased allele quantification and a low error rate are enabled by single molecule barcoding  
136 during the PCR amplicon library preparation (Fig 1B). Sequencing reads sharing identical  
137 barcodes are grouped to create consensus sequences of the genetic variants initially present in  
138 the population. The single molecule barcoding step has two major advantages. Firstly, it allows

139 error correction of the sequenced DNA and thus high confidence in calling of a resistance  
140 associated mutations that might occur at a frequency well below the inherent error rate (~1%  
141 (Schirmer et al. 2015)) of the sequencer. Secondly, it permits accurate quantification of allele  
142 frequencies by correcting for the amplification bias introduced during the exponential PCR step.  
143 The RM-seq bioinformatics pipeline takes as input the raw reads and outputs a table of all  
144 annotated substitutions, insertions and deletions identified in the selected population given the  
145 original sequence (the target locus sequence before selection). A diagram of the steps in the  
146 data analysis pipeline is presented in Fig 1C (RM-seq analysis tool is available from  
147 <https://github.com/rguerillot/RM-seq>).

148

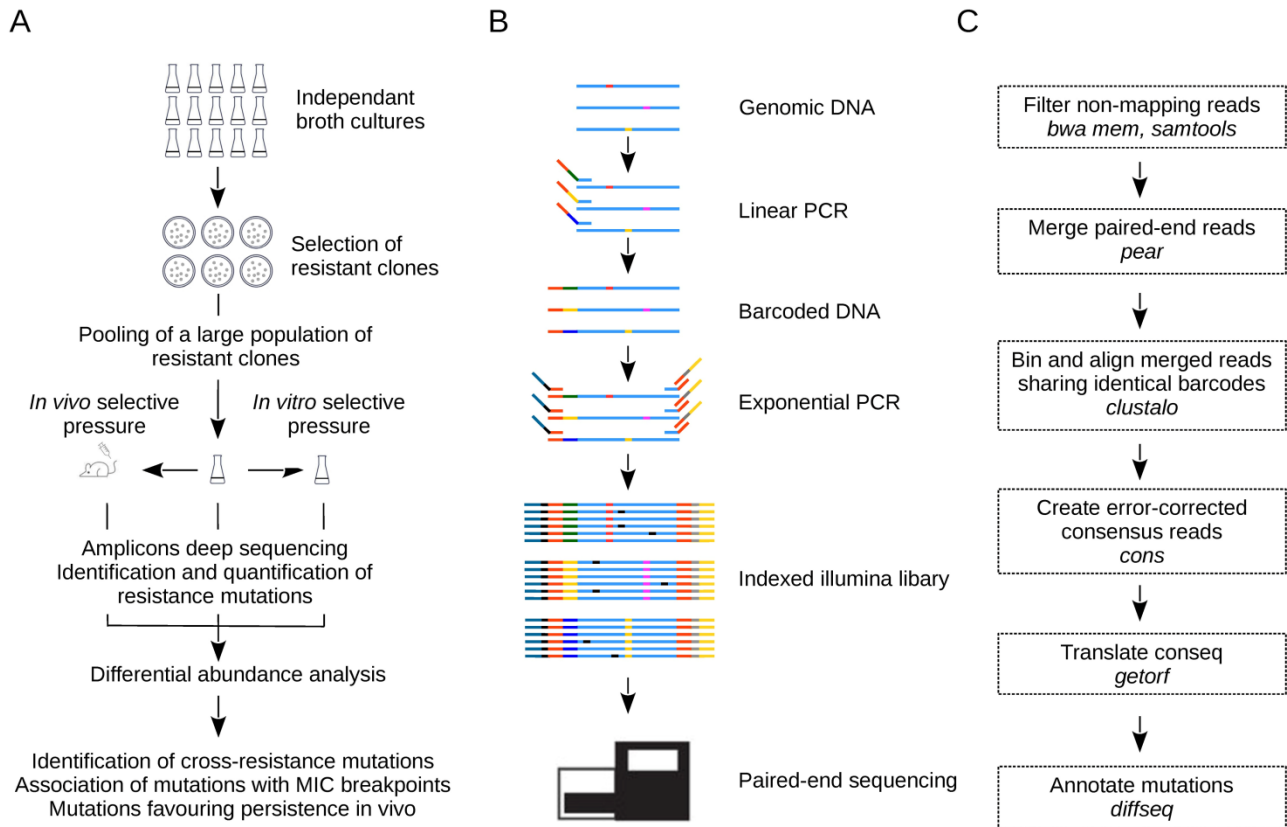

149

150 **Fig 1: RM-seq workflow.** **A.** Schematic view of the experimental design. A large population of  
 151 resistant clones are selected *in vitro* from multiple independent cultures. The mutation repertoire  
 152 selected in a resistance associated locus is then identified by amplicon deep-sequencing. Analysis  
 153 of the differential abundance of resistance mutations among a resistant clone library before and  
 154 after a subsequent *in vitro* (cross-resistance) or *in vivo* (mouse infection model) selection pressure  
 155 permits the screening of pleiotropic resistance mutations. **B.** Amplicon library preparation and  
 156 deep-sequencing. Unique molecular barcodes are introduced by linear PCR (template elongation)  
 157 using a primer comprising a 16 bp random sequence (green, yellow and blue part of the middle  
 158 section of the linear PCR primer). Nested exponential PCR using three primers adds Illumina  
 159 adapters (blue and yellow primer tails) and indices for multiplexing (black and grey primer  
 160 sections). Grouping of the reads sharing identical 16 bp barcodes allows differentiation of true  
 161 SNPs (red, pink and yellow) from sequencing errors (black) by consensus sequence reconstruction  
 162 using multiple reads from the initial template molecule. Counting the number of unique barcodes  
 163 for each variant provides an unbiased relative quantification of sequence variants.  
 164 **C.** Bioinformatics analysis pipeline. The diagram represents the different steps in the data  
 165 processing pipeline. The bioinformatics programs used in the pipeline are indicated in italics.



166 **Sensitive and quantitative detection of single nucleotide variants in complex bacterial**  
167 **populations.**

168 To assess the capability of the RM-seq protocol to detect and quantify rare genetic variants from  
169 mixed populations of resistant bacteria, we first evaluated its error correction efficiency. We  
170 sequenced at high depth a 270 bp region comprising the rifampicin resistance determining  
171 region (RRDR) of a *S. aureus* rifampicin susceptible isolate (wild-type strain NRS384). By  
172 counting incorrect nucleotide calls at each position after aligning raw reads to the WT sequence,  
173 we found an average error rate per position of  $2.8 \times 10^{-2} \pm 1.7 \times 10^{-2}$  (standard deviation [SD]),  
174 which is commonly observed for the Miseq instrument (Schirmer et al. 2015). Merging forward  
175 and reverse reads reduced the error rate by an order of magnitude to  $5.6 \times 10^{-3} \pm 4.4 \times 10^{-3}$  (SD).  
176 By reconstructing consensus reads supported by at least 10 reads, the RM-seq further reduced  
177 the error rate by three orders of magnitude to  $1.16 \times 10^{-5} \pm 3.1 \times 10^{-5}$  (SD) (Fig 2A). At the protein  
178 level no further mutations were observed among the 16,516 consensus reads generated (error  
179 rate  $< 6 \times 10^{-5}$ ).

180

181 We then tested the performance of RM-seq genetic variant quantification on a defined  
182 population of genetically reconstructed rifampicin resistant clones. Six different double or  
183 single nucleotide variants (SNV) representing different rifampicin resistant *rpoB* mutants were  
184 mixed at a relative CFU frequency of 0.9, 0.09, 0.009, up to 0.000009. We applied RM-seq  
185 protocol three times independently from three different genomic DNA extractions obtained  
186 from this mock community. After library preparation and sequencing on the Illumina MiSeq  
187 platform, we obtained 1.8 - 2.2 million raw reads per library, which yielded between 32,433 and  
188 35,496 error-corrected consensus reads, supported by 10 reads or more. At this sequencing  
189 depth the mutants ranging from a relative frequency of  $\sim 1$  to  $10^{-4}$  were readily identified in all  
190 three replicates. The normalised count of the different mutants showed little variation between

191 the replicate experiments (Fig 2B) and we observed a very good correlation between the  
192 expected mutant frequencies and the observed frequencies after RM-seq (Fig 2C). We also  
193 assessed the technical variability of the detection and quantification of RM-seq by  
194 independently processing three times the same complex population of *in vitro* selected resistant  
195 clones (~10,000 colonies). The relative standard error (RSE) of variant quantification ranged  
196 from 0.3% for the most frequent to 38% for rarest variants and the median RSE was 11% (Fig  
197 2D).

198

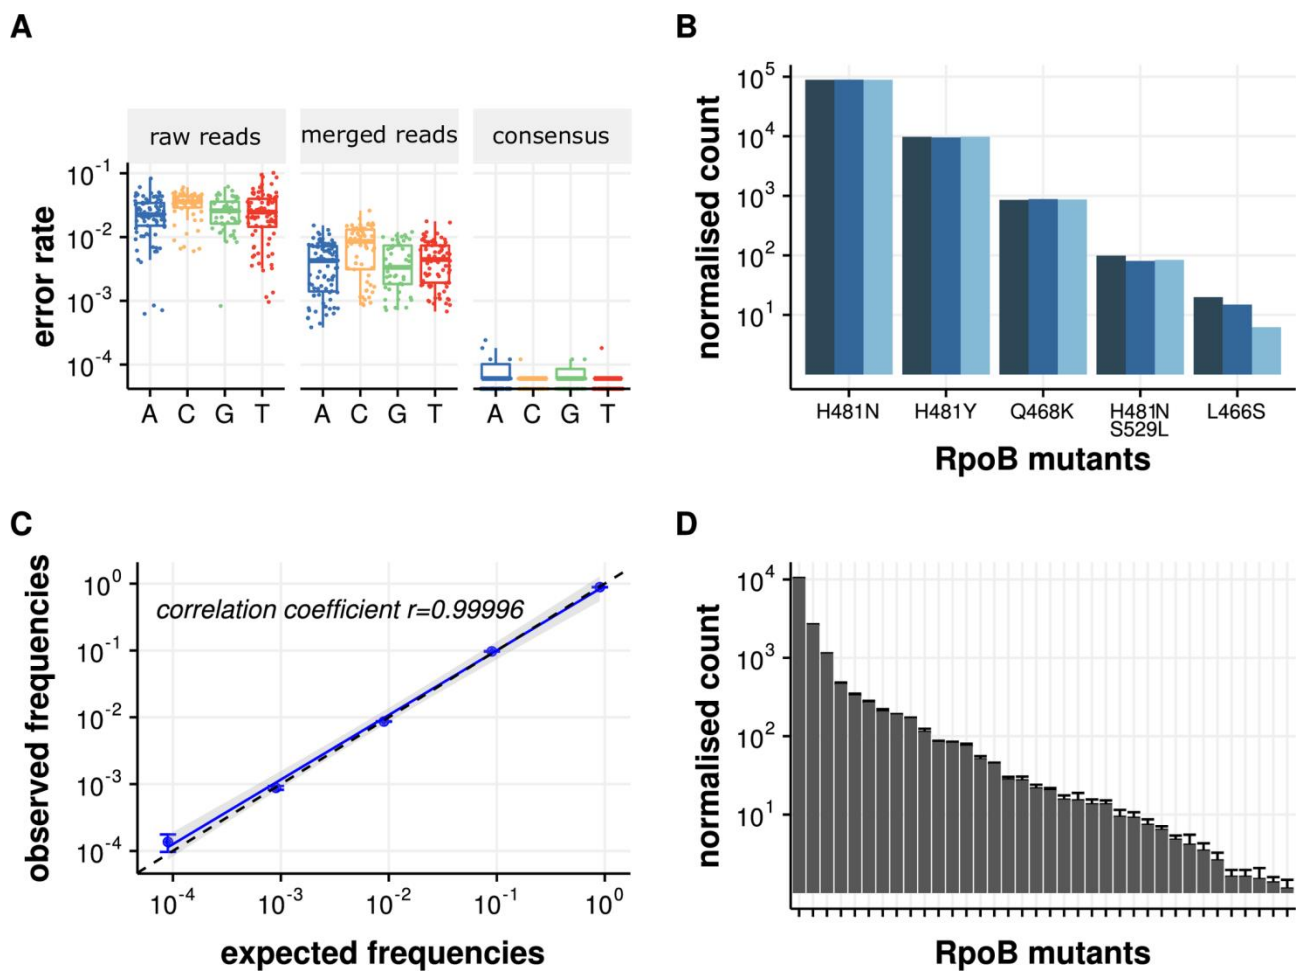

199

200 **Fig 2: Assessments of the RM-seq protocol.** *A. Error-correction evaluation. RM-seq error-*  
201 *correction combining merging of paired-end reads with consensus sequence determination from*  
202 *grouped reads sharing identical barcode allows a three order of magnitude reduction in false SNP*  
203 *calling when compared with raw reads calling for the different base. B. Quantification of*  
204 *populations of S. aureus rpoB mutants. Three independent assessments of rpoB mutants from*  
205 *three independent genomic DNA preparations originating from a defined population are*  
206 *presented by the different blue bars (technical replicates). C. Correlation of observed versus*  
207 *expected SNV frequencies. Blue points represent means and error bars represent SEM of three*  
208 *technical replicates. The blue line represents the linear regression of the frequencies measured by*  
209 *RM-seq and the dashed line represent the perfect correlation between expected and observed*  
210 *frequencies. D. Quantification of S. aureus rpoB mutants from a complex population of in vitro*  
211 *selected rifampicin resistant mutants. Columns represent mean normalised counts of the different*  
212 *rpoB mutations that were observed among all triplicates, and error bars represent SEM.*

213 **High-throughput identification of rifampicin resistance mutations.**

214 In order to comprehensively characterise the mutational repertoire associated with rifampicin  
215 resistance we applied RM-seq on the RRDR of three independent pools of ~10,000 colonies  
216 capable of growing on agar supplemented with 0.06 mg/L of rifampicin (European Committee  
217 on Antimicrobial Susceptibility Testing [EUCAST] non-susceptibility clinical breakpoint). In  
218 total, we identified 72 different predicted protein variants; among these 34 were identified in  
219 the three independent resistant populations, 17 variants were identified among two resistant  
220 populations, and 21 were identified in a single selection experiment (Fig 3). According to our  
221 recent extensive literature review of the alleles previously associated with rifampicin resistance  
222 (Guérillot et al. 2018), 30 mutations were previously associated with rifampicin non-  
223 susceptibility and 42 alleles identified by RM-seq represent new associations.

224

225 By looking at the different mutated positions, 21 amino-acid positions were repeatedly affected  
226 along the RRDR with a similar pattern of mutation frequency at these positions. We observed  
227 that 11 different amino acid positions have never previously been associated with rifampicin  
228 resistance. The 3D structure modelling of *S. aureus* RpoB protein from *E. coli* RpoB-rifampicin  
229 structure showed that the mutated positions were all in close proximity ( $\leq 10$  Å) to the  
230 rifampicin binding pocket of the beta-subunit of the RNA polymerase  
231 (Supplemental\_Fig\_S1.pdf). Therefore, amino-acid sequence alteration at these positions are  
232 likely to reduce the rifampicin-RNA polymerase affinity and thus to promote resistance.  
233 Interestingly several residues in close proximity to the rifampicin binding pocket were never  
234 affected, suggesting that amino acid substitution at these locations do not impair rifampicin  
235 binding or that functional constraints make changes to these positions lethal for *S. aureus*. The  
236 vast majority of the variants led to amino acid substitutions and several positions, such as 471  
237 and 481 were found to be affected by a high number of different substitutions (11 and 12  
238 respectively). We also observed one complex insertion (S464QF) and eight different deletions.

239 Positions 485 and 487 represented deletion hot-spots, as they were affected by single, triple  
240 and quadruple residue deletions (L485., LSA485., LSAL485.) and single and double deletions  
241 (A487. and AL487.), respectively.

242 We used allelic exchange and site-directed mutagenesis in the WT susceptible background  
243 (rifampicin MIC 0.012 mg/L) to reconstruct 19 different *rpoB* alleles that were identified by RM-  
244 seq. After whole genome sequencing was used to ensure no secondary non-synonymous  
245 mutations or insertion/deletion were introduced (Supplemental\_Table\_S1.pdf), we confirmed  
246 that all these mutations resulted in rifampicin non-susceptibility or resistance with rifampicin  
247 MICs above 0.095 mg/L (Supplemental\_Table\_S2.pdf).

248

249

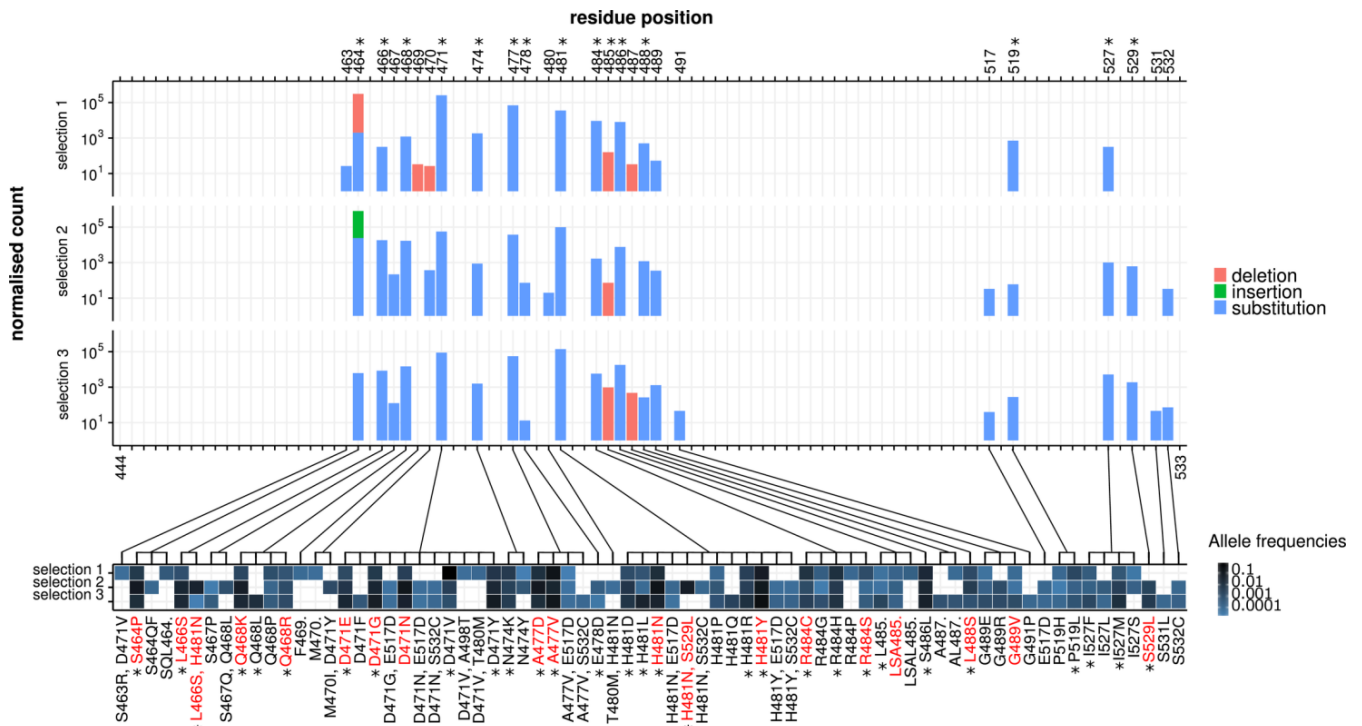

250

251

252 **Fig 3: Rifampicin resistance associated mutations detected by RM-seq.** Three independent  
 253 selection experiments of ~10,000 resistant colonies were assessed by RM-seq of the *rpoB* gene  
 254 RRDR region. The histograms (upper) represent the normalised mutation counts identified along  
 255 the sequenced region of the RRDR for the three different selection experiments, with bar colour  
 256 representing the types of mutation (red for deletions, green for insertions and blue for  
 257 substitutions). The range of mutations affecting each residue is depicted in the associated heat  
 258 map (lower panel). The intensity of the blue represents allele frequencies for each selection  
 259 experiment. Mutations observed from consensus reads reconstructed with at least 10 reads and  
 260 with a relative frequency greater than  $6 \times 10^{-5}$  or identified from all three independent selection  
 261 experiments are represented. Resistance mutations that were confirmed by genetic reconstruction  
 262 are indicated in red (Supplemental\_Table\_S2.pdf). Mutations and positions previously associated  
 263 with rifampicin resistance are indicated with a star.

264 **High-throughput genotype to phenotype associations of resistance mutations with**  
265 **clinical breakpoints.**

266 To test if RM-seq could be applied to link a repertoire of resistance mutations to a particular  
267 resistance threshold, we selected rifampicin resistant clones, grown on plates supplemented  
268 with different concentrations of antibiotic (in this case, rifampicin). To select resistant sub-  
269 populations we used the most widely used clinical resistance breakpoints from the guidelines  
270 of the EUCAST and the Clinical & Laboratory Standards Institute (CLSI) (EUCAST 2015; CLSI .  
271 Performance standards for antimicrobial susceptibility testing 2016). Therefore, we selected  
272 sub-populations growing on plates supplemented with rifampicin at concentrations of 0.06  
273 mg/L (EUCAST non-susceptibility), 0.5 mg/L (EUCAST resistance), 1 mg/L (CLSI non-  
274 susceptibility) and 4 mg/L (CLSI resistance). The result of resistant sub-population detection  
275 and quantification by RM-seq associated with the different antibiotic concentration thresholds  
276 is presented in Fig 4. Among 43 mutations, 24 mutations were detected at all antibiotic  
277 concentration thresholds and therefore would be classified as resistance-conferring mutations  
278 by both guidelines. Among the 19 other mutations detected, four were associated with  
279 resistance levels ranging from 1 to 4 mg/L, three with resistance ranging from 0.5 to 1 mg/L  
280 and the remaining 12 with resistance ranging from 0.006 to 0.5 mg/L. Interestingly, *S. aureus*  
281 with any of these last 12 alleles, selected only at low antibiotic concentrations, would be  
282 classified as non-susceptible by EUCAST and susceptible by CLSI. Similarly, *S. aureus* with three  
283 mutations associated with resistance by EUCAST would be classified as susceptible by CLSI (Fig  
284 4).

285

286 We used mutants reconstructed by allelic-exchange to verify that the resistance level predicted  
287 by RM-seq matched the MIC conferred by a particular allele. Among 17 reconstructed mutants  
288 tested, 16 showed MICs in complete accord with the RM-seq prediction  
289 (Supplemental\_Table\_S2.pdf). One mutant (D471G) with a borderline measured MIC of 0.5

290 mg/L was predicted to have an MIC superior to 0.5 and inferior or equal to 1 despite showing  
 291 clear reduction in abundance on 0.5 mg/L plate by RM-seq (Fig 4).  
 292  
 293

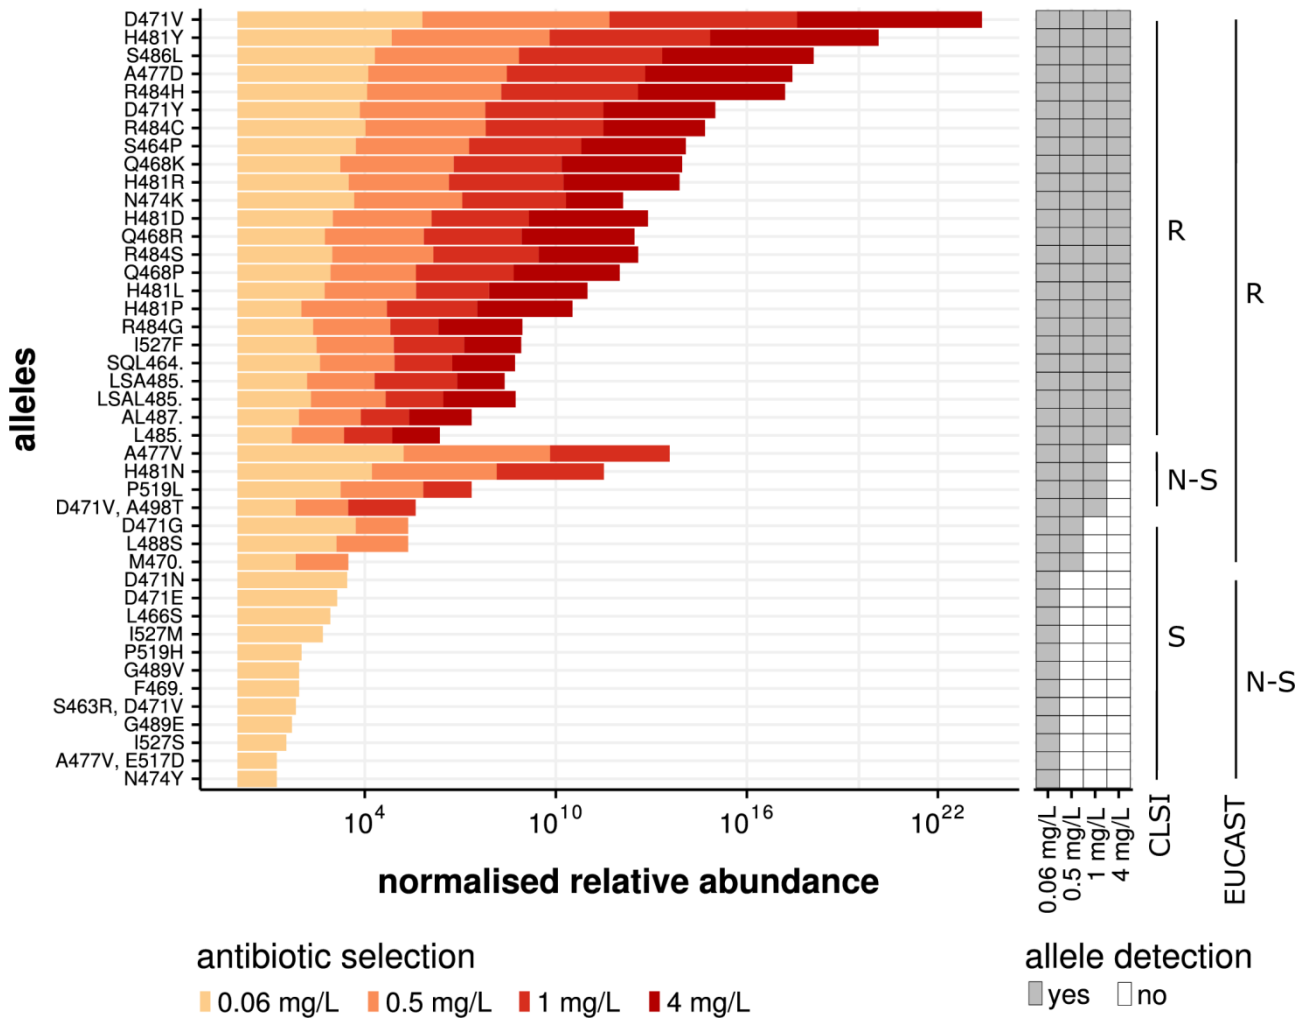

294  
 295  
 296 **Fig 4: Association of resistance mutations with clinical MIC breakpoints.** The histogram  
 297 represents the relative abundance of individual mutations recovered from the selected sub-  
 298 population. The colour yellow to red represents the rifampicin concentration used for selection.  
 299 The antibiotic concentrations were chosen according to the CLSI and EUCAST guidelines (see  
 300 legend). The detection (grey box) and disappearance (white box) of a particular allele from the  
 301 population at the different antibiotic selection break-points is depicted on the right of the  
 302 histogram. The presence or absence of allele detection at the different antibiotic concentration  
 303 breakpoints were used to associate the alleles with sensitive, non-susceptible or resistant  
 304 classification of the CLSI and EUCAST guidelines (S, susceptible; R, resistant; N-S, non-susceptible).



305 **High-throughput screening of resistance mutations associated with antimicrobial cross-**  
306 **resistance or collateral sensitivity.**

307 In order to evaluate if RM-seq can be used to characterise pleiotropic resistance mutations that  
308 confer an increased or decreased susceptibility to a second antibiotic (cross-resistance or  
309 collateral sensitivity respectively), we followed the differential abundance of resistance  
310 mutations of a complex rifampicin resistant population after selection with a second antibiotic,  
311 daptomycin. We chose daptomycin because it is a last-line antibiotic used against multidrug  
312 resistant *S. aureus*, commonly deployed in combination therapy with rifampicin to treat  
313 complicated infections (Forrest and Tamura 2010; Saleh-Mghir et al. 2011; Garrigós et al. 2010).  
314 Furthermore, some *rpoB* mutations have been previously associated with subtle changes in  
315 daptomycin MIC (Cui et al. 2010; Aiba et al. 2013). We screened for pleiotropic effects on  
316 daptomycin resistance by performing three independent time killing experiments using a large  
317 *in vitro* derived population of rifampicin resistant clones. Daptomycin concentrations of 8 mg/L  
318 corresponding to the minimal plasma concentration commonly reached during standard  
319 antibiotic therapy were used (Reiber et al. 2015). Survival of the rifampicin resistant population  
320 at 3 hours represented 1.6% ( $\pm$  0.1 SEM) of the initial inoculum and bacterial regrowth was  
321 observed to 8.8% ( $\pm$  6.9 SEM) at 24 hours (Fig 5A). The abundance of all rifampicin resistance  
322 mutations were then quantified by RM-seq for the initial bacterial population (the inoculum)  
323 and the surviving population at three hours and 24 hours after daptomycin exposure for the  
324 three independent killing experiments (Fig 5B).

325

326 We tested for significant differential abundance of all the different mutations detected (Fig 5C).  
327 After 3 hours of daptomycin treatment, one mutation appeared to increase in frequency  
328 (Q468K) and another decreased (P519L) but the null hypothesis (no change) could not be  
329 rejected ( $p > 0.05$  after correction for multiple testing [Wald test]). At 24 hours of daptomycin  
330 selection, differential abundance of these two mutations increased, together with 10 other

331 rifampicin resistance mutations when compared with the mutant abundance in the initial  
332 population (Fig 5D). All the rifampicin resistance mutations that were previously identified as  
333 conferring decreased susceptibility to daptomycin (n=6) were found enriched after daptomycin  
334 selection, and four mutations had significant fold changes at the 24-hour time point ( $p < 0.05$ ,  
335 Wald test). These experiments show that changes in relative allele abundance as measured by  
336 RM-seq are concordant with changes in daptomycin susceptibility (Berti et al. 2015; Aiba et al.  
337 2013).

338

339 In order to validate the use of RM-seq as a screening method to identify new mutations that  
340 confer cross-resistance or collateral sensitivity we introduced in the wild-type strain by allelic  
341 exchange seven rifampicin resistant mutations that were significantly enriched and three  
342 mutations that were significantly rarefied after daptomycin selection. Among these mutations,  
343 MIC testing validated six of the seven rifampicin resistance mutations as decreasing  
344 susceptibility to daptomycin and one mutation as increasing the daptomycin susceptibility  
345 (Supplemental\_Table\_S2.pdf). We then performed daptomycin time kill assays and found that  
346 even though the D471E mutation did not show a decreased MIC to daptomycin  
347 (Supplemental\_Table\_S2.pdf), this mutant was less tolerant to daptomycin (Fig 5E), concordant  
348 with the RM-seq prediction which demonstrated reduced abundance of this mutation after  
349 daptomycin exposure (Fig 5D). Similarly, rifampicin resistance mutations L488S, G489V, A477V  
350 and Q468K were clearly associated with increased tolerance to daptomycin killing (Fig 5E).

351

352 Taken together our data demonstrate that RM-seq can identify pleiotropic resistance mutations  
353 conferring changes in susceptibility to a secondary antibiotic from large pool of resistant clone  
354 selected *in vitro* after exposure to a primary antibiotic.

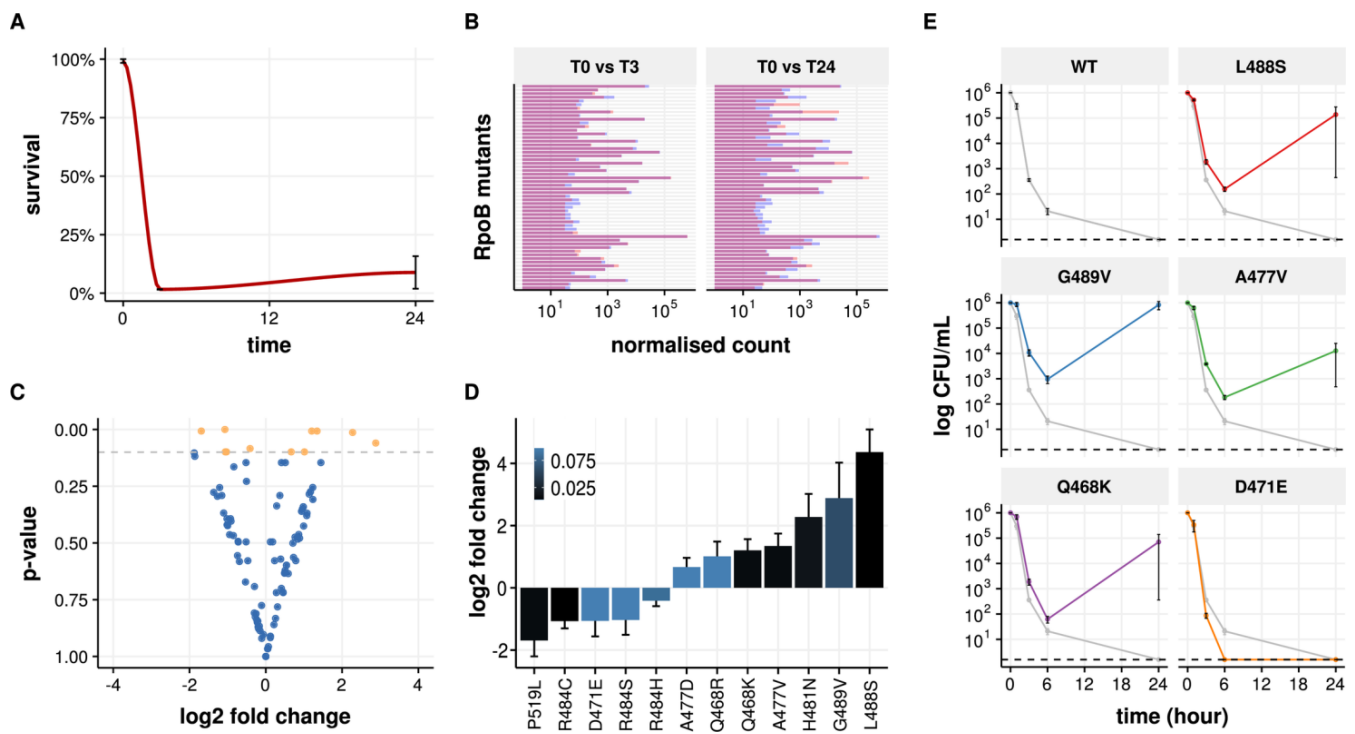

355

356

357 **Fig 5: Screening of resistance mutations associated with cross-resistance or collateral**  
 358 **sensitivity.** **A.** Daptomycin selection (8 mg/L) of a pooled population of *in vitro* selected rifampicin  
 359 resistant clones. Survival was quantified by CFU counting on BHI agar plates at 3 hours and 24  
 360 hours of exposure. Error bars represent  $\pm$  SEM of three independent exposures to daptomycin. **B.**  
 361 Rifampicin resistant mutant quantification of rifampicin mutant before and after 3 hours or 24  
 362 hours of daptomycin exposure. Each bar of the histogram represents the averaged normalised  
 363 count of the different *rpoB* mutants in the population. Average quantification of the three  
 364 replicates at  $T=0$  and after daptomycin exposure are indicated by blue and red bars respectively.  
 365 Bars are superimposed for each mutant and overlap of the bars are coloured in purple. Increases  
 366 and decreases in allele frequencies after daptomycin exposure are indicated by red and blue bars  
 367 respectively on the top of purple bars. **C.** Volcano plot showing fold change in *rpoB* alleles frequency  
 368 after 24 hours of daptomycin exposure. Each dot represents a different *rpoB* mutant. Orange dots  
 369 represent mutants with  $p$ -value  $<0.1$  by Wald test. **D.** Rifampicin resistance mutations associated  
 370 with significant fold change after 24 hours of daptomycin treatment. Mutations with positive and  
 371 negative log<sub>2</sub> fold change are predicted to be associated with cross-resistance and collateral  
 372 sensitivity to daptomycin, respectively. The intensity of the blue coloration of the bars represents  
 373 adjusted  $p$ -values (Wald test). **E.** Daptomycin time kill assays. Rifampicin resistant mutants were  
 374 assessed in triplicates (biological replicates), points represent the mean survival at each time point  
 375 and error bars SD. Dashed lines represent detection limit.

376 **Tracking resistant clones *in vivo* in a mouse infection model.**

377 The relationship between resistance selection, *in vivo* fitness cost and pathogenicity has been a  
378 long standing research topic (Beceiro et al. 2013; Cameron et al. 2011; Holmes et al. 2011; Gao  
379 et al. 2010; Beceiro et al. 2012). In a proof-of-principle experiment to investigate the dynamics  
380 and fitness of resistance mutations *in vivo*, we followed the abundance of rifampicin resistance  
381 mutation by RM-seq in a mouse model of persistent infection. Six-week-old BALB/c mice were  
382 injected via the tail vein with a complex, *in vitro* derived population of rifampicin resistant  
383 mutants that also included susceptible WT clones. We then quantified the abundance of RpoB  
384 mutants in the inoculum and at 1 and 7 days post-infection in the kidney, liver and spleen of the  
385 mice (Fig 6). At 24 hours post infection, we recovered a diverse set of RpoB mutants with  
386 different relative abundances in the two mice tested. The diversity of mutants appeared to be  
387 reduced when compared with the inoculum in the different organs and several initially  
388 abundant mutants were not recovered showing a rapid clearance of several inoculated clones.  
389 Interestingly, at 7 days post-infection we observed a drastic reduction in resistant clone  
390 diversity with only a small number of clones dominating. This result supports the concept that  
391 the establishment of *S. aureus* infection in the mouse is highly clonal, following a “bottleneck”  
392 in which very few bacterial cells establish infectious foci or abscesses in invaded organs  
393 (McVicker et al. 2014). Despite the intravenous inoculum containing a diversity of resistant  
394 clone, we observed that within a given mouse different organs were infected with the same  
395 clones.

396

397 We then infected mice with an inoculum comprising an equal amount of 10 reconstructed RpoB  
398 mutants together with the wild-type susceptible strain. After 7 days of infection four mice were  
399 analysed for RpoB mutant abundance by RM-seq. As observed in the previous experiment, the  
400 wild-type allele did not persist after 7 days, showing that resistant clones are not outcompeted  
401 by the wild-type clone for persistence in the mouse model; even without antibiotic selective

402 pressure (Fig 6). Three out of four mice were infected with clones encoding the H481N  
403 mutation, which has been found to be the most frequent mutation among sequenced *S. aureus*  
404 human isolates (Guérillot et al. 2018), two had the L466S, H481N double mutation and one had  
405 H481N only. Intriguingly, because the mice were infected simultaneously with 11 different  
406 clones, the probability is low that at least two mice would become infected with the L466S,  
407 H481N by chance ( $p=0.043$ ). The probability is also low that at least three mice would become  
408 randomly infected by a clone encoding the H481N mutation ( $p=0.057$ ). Given the relatively  
409 small number of mice investigated here, no conclusions can be drawn on the potential  
410 competitive advantage of specific resistance mutations *in vivo*. Nevertheless, we show here that  
411 RM-seq can be used to follow the dynamics of complex populations of clones in a mouse  
412 infection model and that the design of complex multi-clone competition assays *in vivo* is  
413 achievable with RM-seq.

414

415

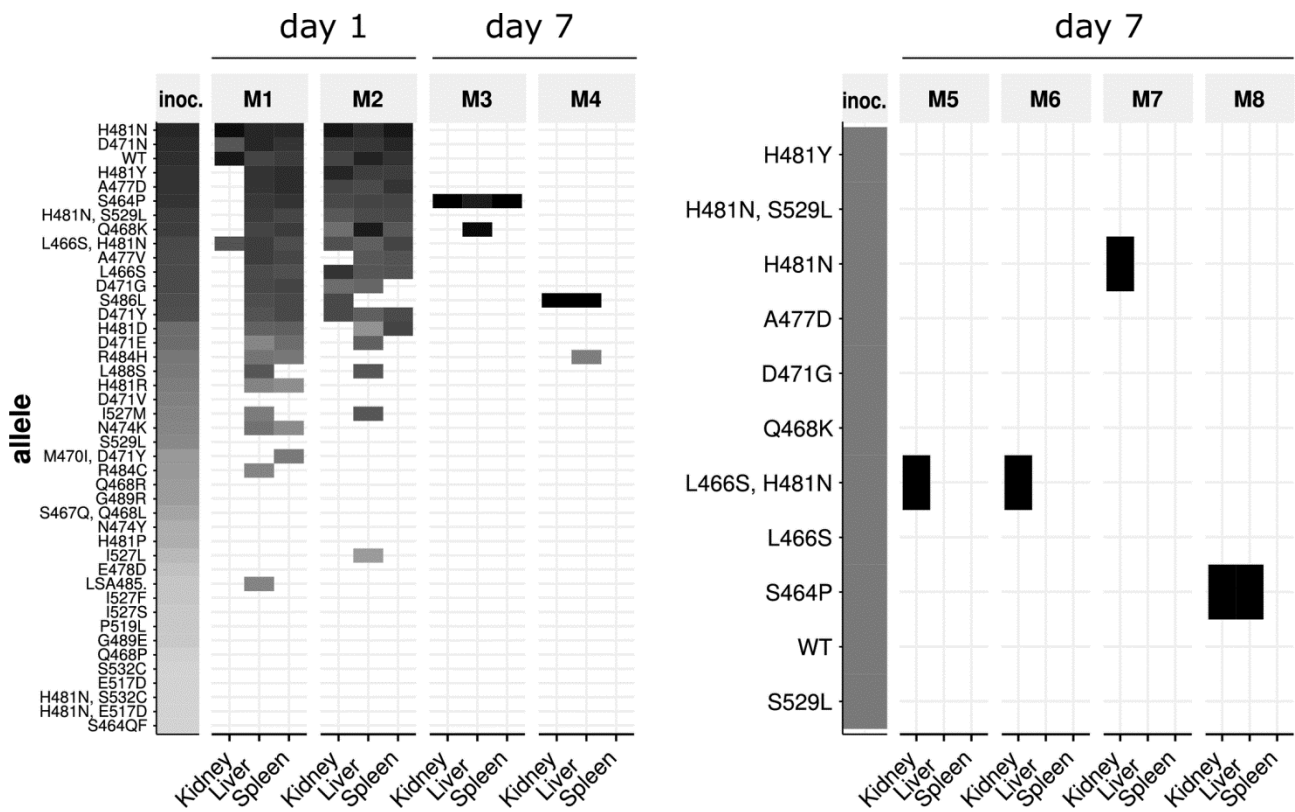

416

417

418 **Fig 6: In vivo detection of rifampicin resistance mutations in a mouse persistence model.**  
 419 *The heat maps represent quantification of RpoB mutants in kidney, liver and spleen of eight*  
 420 *different mice after 1 or 7 days infection with a complex in vitro selected population (mice M1 to*  
 421 *M4 on the left) or with a genetically defined population of rifampicin resistant clones (mice M5 to*  
 422 *M8). The columns labelled 'inoc.' represent the initial inoculum. Grey and black boxes represent*  
 423 *low and high relative allele abundance.*

424 **Detection of low frequency resistant sub-populations of *M. tuberculosis* from sputum**  
425 **samples.**

426 A primary motivation for developing RM-seq is to reduce inappropriate antimicrobial therapy  
427 by allowing the early detection of low frequency drug resistant sub-populations that can arise  
428 during antimicrobial therapy. Treatment of tuberculosis, caused by infection with  
429 *M. tuberculosis*, could be significantly improved by an accurate and sensitive amplicon  
430 sequencing method. This is because culture-based methods to detect resistance can take weeks  
431 to obtain a result and current rapid molecular diagnostic methods only detect a handful of  
432 commonly occurring mutations and have low sensitivity for the detection of resistant sub-  
433 populations (Zetola et al. 2014). A technique that was comprehensive and relatively rapid,  
434 particularly when infection with multi-drug resistant *M. tuberculosis* was suspected, would arm  
435 clinicians with rich data to inform effective antibiotic treatment regimens.

436  
437 To assess the potential applicability of RM-seq for clinical detection of resistant sub-population  
438 we retrospectively applied RM-seq on genomic DNA extracted from sputum samples of a patient  
439 affected by chronic pulmonary multi-drug-resistant tuberculosis. Multiple sputum isolates from  
440 this case of chronic *M. tuberculosis* infection have been previously investigated by whole  
441 genome sequencing (Meumann et al. 2015). Here we investigated the emergence of resistance  
442 mutations from two samples (sampling interval of 11 years) of three different loci in the genes  
443 *rpoB*, *pncA* and *ethA* associated with resistance to rifampicin, pyrazinamide and ethionamide.  
444 The multiple changes that were made to the treatment regimen are summarized in Fig 7. Using  
445 RM-seq we found four other low frequencies *rpoB* mutants in addition to the dominant *rpoB*-  
446 S450L alleles previously associated with rifampicin resistance in this case (Fig 7)(Donnabella  
447 et al. 1994). Among those, *rpoB*-H445N (frequency of  $1.24 \times 10^{-3}$ ) and *rpoB*-G442W (frequency  
448 of  $6.86 \times 10^{-4}$ ) represent known rifampicin resistance conferring alleles (Ramaswamy et al.

449 2004; Pozzi et al. 1999). In the later sputum samples collected 12 years after the end of  
450 rifampicin treatment these low frequencies sub-populations of rifampicin resistant clones were  
451 not detected but the dominant rifampicin resistant population harbouring mutation *rpoB*-  
452 S450L persisted together with a low frequency population harbouring the *rpoB*-P471Q allele.  
453 In association with pyrazinamide resistance the resistant allele *pncA*-I31F dominated the  
454 population after a year and half of treatment together with a low frequency of double mutant  
455 sub-population represented by the allele *pncA*-R29S-I31F. The resistant mutant *pncA*-I31F was  
456 also detected on the later isolate. Surprisingly, early samples were susceptible to pyrazinamide  
457 as established by phenotypic testing despite a high prevalence of the *pncA*-I31F resistant allele.  
458 For ethionamide resistance, the wild-type version of the gene *ethA* was initially dominant in the  
459 population (frequency of  $8 \times 10^{-1}$ ) together with a low frequency allele not associated with  
460 resistance *ethA*-H102P (frequency of  $2 \times 10^{-1}$ ). The ethionamide resistance mutation *ethA*-  
461  $\Delta A338$  causing a frameshift in the gene was readily detected in accordance with phenotypic  
462 testing in the later sputum sample. Thus, RM-seq was able to identify low frequency sub-  
463 populations of antibiotic resistant *M. tuberculosis*.



464

465

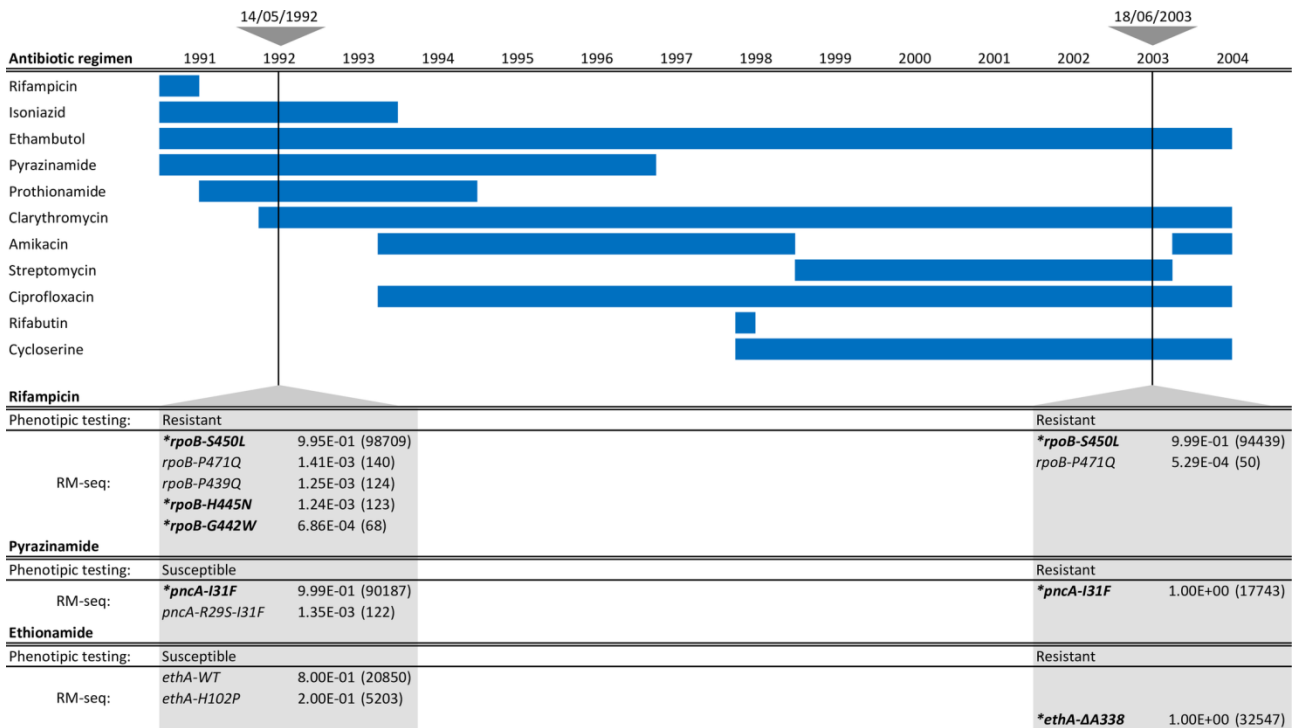

466

467

468 **Fig 7: Detection of low frequency resistant sub-populations of *M. tuberculosis* from sputum**  
 469 **samples.** Depicted on the top left are the antibiotics used with the date that each treatment was  
 470 initiated and the duration indicated by the blue horizontal bars. The two triangles at the top of  
 471 the figure represent the early and late DNA extracts used for RM-seq. The table at the bottom shows  
 472 phenotypic testing and RM-seq results for rifampicin, pyrazinamide and ethionamide for the two  
 473 samples tested. For RM-seq results the frequency of each allele is indicated and the number of  
 474 consensus reads is in parenthesis. Alleles in bold and annotated with star represent alleles known  
 475 to confer antibiotic resistance. Consensus reads reported were reconstructed from at least six  
 476 reads and alleles represented by at least 50 consensus reads.

## 477 **DISCUSSION**

478 In this study, we designed and validated a new high-throughput workflow call RM-seq that  
479 enables fast and comprehensive characterisation of antibiotic resistance mutations. We show  
480 that a straightforward molecular PCR-based barcoding step coupled with high throughput  
481 sequencing significantly reduces background sequencing noise and permits accurate  
482 identification and quantification of rare resistance mutations in complex bacterial populations.  
483 By applying RM-seq on large pools of *in vitro* selected rifampicin resistant *S. aureus* clones, we  
484 demonstrate that the mutational resistome of a resistance locus can be defined. We found that  
485 the range of rifampicin resistance mutations in *S. aureus* is broader than previously understood,  
486 highlighting the inadequacy of our understanding of the genetic basis of resistance. Here, 72  
487 mutations were associated with rifampicin resistance in *S. aureus*. In comparison, the CARD  
488 database of antibiotic resistance markers only contains 6 rifampicin resistance mutations  
489 (McArthur et al. 2013). As the RM-seq protocol can be applied on any combination of  
490 microorganisms and resistance, its use has the potential to greatly enhance current knowledge  
491 on microbial adaptation to antibiotic exposure.

492  
493 One limitation of RM-seq is the size limit of the sequenced region that can be interrogated by a  
494 single amplicon (270 bp with fully overlapping reads). This limitation is imposed by the  
495 maximum read length of Illumina® paired-end sequencing technology. Nevertheless, because  
496 RM-seq is compatible with standard Nextera® indexing primers, up to 384 resistance targets  
497 can be multiplexed in a single sequencing run. Furthermore, when performing read sub-  
498 sampling simulation, we found that the number of high quality consensus reads increase almost  
499 linearly with the number of reads when performing low depth sequencing  
500 (Supplemental\_Fig\_S2.pdf). As little as 140,000 reads would be sufficient to obtain 10,000  
501 consensus reads supported by 10 reads. Theoretically, all resistance variants arising among

502 more than 350 different targeted regions of 270 bp would be accurately identified from a mixed  
503 population 1000 bacterial clones using a single MiSeq run (94500bp, ~86 different genes). This  
504 kind of experimental design would be valuable to characterise the genetic basis of poorly  
505 defined resistance mechanisms or to determine all the resistance mutation arising in a  
506 particular gene. During the preparation of this manuscript, we scanned the full genes *mprF*  
507 (2523 bp) and *cls2* (1482 bp) for mutations conferring daptomycin resistance in *S. aureus* by  
508 sequencing 10 and six amplicons respectively (manuscript in preparation). For the  
509 development of diagnostic tool multiple resistance hotspots could be assessed by RM-seq using  
510 a similar design.

511

512 The application of RM-seq is not restricted to the high-throughput identification of resistance  
513 mutations and can also be used to characterise the phenotypic impact of specific resistance  
514 mutations. We demonstrate here that differential mutation abundance analysis can be  
515 performed to link subsets of mutations with clinical resistance breakpoints and to identify  
516 resistance mutations that favour survival or multiplication in particular conditions.  
517 Comparisons of allele frequencies in mixed populations before and after exposure to a second  
518 antibiotic permitted the identification of specific resistance mutations that confer cross-  
519 resistance and collateral sensitivity. The demonstration that several specific rifampicin  
520 resistance mutations can prevent bacterial clearance by daptomycin *in vitro* can have potential  
521 clinical implication regarding the usage rifampicin and daptomycin in combination therapy. A  
522 deeper understanding of how evolution of microbial resistance towards a given antibiotic  
523 influences susceptibility or resistance to other drugs would have profound impact as it could be  
524 exploited to fight resistance rise through combination therapy or by the temporal cycling of  
525 different antibiotics (Pál et al. 2015; Rodriguez De Evgrafov et al. 2015; Imamovic and Sommer  
526 2013).

527

528 We also showed that the persistence of resistance alleles can be followed during experimental  
529 infection (murine blood stream infection model). As it is known that specific resistance  
530 mutations can favour pathogenesis and immune evasion (Beceiro et al. 2013; Gao et al. 2013;  
531 Bæk et al. 2015), RM-seq can be used to screen for resistance mutations that increase or  
532 decrease survival against *ex vivo* selective pressures (eg. whole blood killing, phagocytosis,  
533 antimicrobial peptide killing, complement killing) or that favour colonisation or tissue invasion  
534 (eg. biofilm formation, cell attachment, intracellular persistence). A better characterisation of  
535 critical resistance mutations that confer cross-resistance or that impact pathogenesis would  
536 permit both improving antibiotic resistance surveillance and drug management if a higher  
537 therapeutic risk is confirmed.

538

539 Fast and culture independent molecular diagnostic tools have revolutionised pathogen  
540 identification and resistance typing in clinical settings. We show here that RM-seq can be used  
541 to detect very low frequency sub-population of resistant clones from patients infected by *M.*  
542 *tuberculosis*. The development of diagnostic tools based on the combination of PCR-based  
543 barcoding and massively parallel sequencing represents a promising approach for the next  
544 generation of genetic-based diagnostics. RM-seq has potential advantages over standard  
545 quantitative and molecular probe-based diagnostic tests. For instance, RM-seq would be more  
546 sensitive than the current best practice platform for rifampicin resistance detection in *M.*  
547 *tuberculosis*, GeneXpert, as this platform fails to identify sub-populations of rifampicin-resistant  
548 strains representing less than 10% of the population (Zetola et al. 2014) and digital PCR and  
549 qPCR assays that have been validated for rare mutations with frequencies-of-occurrence not  
550 lower than 0.1% (Whale et al. 2016). This property of RM-seq may have important clinical  
551 implications as similarly to molecular test, most phenotypic tests fail to detect heterogeneous  
552 resistance with resistance allele frequency below 1%, and lower frequency of resistance have  
553 been frequently described (Eilertson et al. 2014; Köser et al. 2014; Howden et al. 2014). RM-

554 seq detection is not conditional on the affinity of short DNA probes, therefore all sensitive and  
555 resistant variant can be detected and differentiated at the sequence level. Therefore, diagnostic  
556 tools based on molecular barcoding and deep sequencing have the potential to perform better  
557 than current state of the art diagnostic tests by accurately detecting pre-existing rare resistant  
558 sub-population as well as uncommon resistance mutations.

559

560 We expect that RM-seq will be a valuable tool for the comprehensive characterisation of the  
561 mutational resistance repertoire. A deeper understanding of resistance at the DNA level will be  
562 the basis for improved genomic surveillance of antibiotic resistant pathogens, optimised  
563 antibiotic treatment regimens, and can ultimately lead to precision medicine approaches for  
564 treating microbial infections.

## 565 **METHODS**

### 566 ***In vitro* selection of rifampicin resistant clones.**

567 All experiments were conducted with *S. aureus* USA300 strain NRS384, acquired from BEI  
568 resources. Rifampicin resistant colonies were selected from 20 independent overnight Heart  
569 Infusion (HI) 10 mL broth cultures ( $5 \times 10^9$  CFU/mL) inoculated from single colonies. Cultures  
570 were pelleted at 10 min at 3000 g and re-suspended in 200  $\mu$ L of HI broth ( $2.5 \times 10^{11}$  CFU/mL).  
571 These concentrated overnight cultures were then pooled and plated on HI plates supplemented  
572 with rifampicin at 0.006, 0.5, 1 and 4 mg/L. Given that the spontaneous resistance rate for  
573 rifampicin in *S. aureus* is  $\sim 2 \times 10^{-8}$  (O'Neill et al. 2001), 20 to 30 plates inoculated with 75  $\mu$ L  
574 were necessary to recover  $\sim 10,000$  resistant clones after 48h incubation at 37°C. All resistant  
575 colonies were recovered by scraping the plate flooded with 2 mL of Phosphate Buffered Saline  
576 (PBS). After washing the pooled clone libraries in PBS, aliquots were used for genomic DNA  
577 extraction and RM-seq library preparation and stocked in 25% glycerol at -80°C.

578

### 579 **Amplicon library preparation and deep-sequencing.**

580 Genomic DNA was extracted from 1 mL aliquots adjusted to an OD<sub>600</sub> of 5 in HI broth. Cells were  
581 pelleted and washed twice in PBS and genomic DNA was extracted using the DNeasy Blood &  
582 Tissue Kit (QIAGEN). Random 16 bp barcodes were introduced by performing 8 cycles of linear  
583 PCR with the primer x\_RMseq\_F (Supplemental\_Table\_S3.pdf) using the following PCR mix: 2  $\mu$ L  
584 of x\_RMseq\_F (5nM), 1  $\mu$ L of genomic DNA (6 ng/ $\mu$ L), 12.5  $\mu$ L Phusion® High-Fidelity PCR  
585 Master Mix (2X, New England BioLabs Inc.), 6  $\mu$ L H<sub>2</sub>O. The following PCR cycle conditions were  
586 used: 30 sec at 98°C, then 8 cycles of 10 sec at 98°C, 30 sec at 50°C, 30 sec 72°C, and a 2 min  
587 elongation step at 72°C. Following the final cycle of the linear PCR, samples were cooled to 25°C  
588 and the nested exponential PCR were performed by immediately adding 3.5  $\mu$ L of a primer mix  
589 containing 2  $\mu$ L of primer x\_RMseq\_R (100 nM), 0.6  $\mu$ L forward and 0.6  $\mu$ L reverse Nextera XT

590 Index Kit primers (10  $\mu$ M), 0.3  $\mu$ L H<sub>2</sub>O. The PCR conditions above were then used for a further  
591 25 cycles. The resulting amplicons comprising Illumina adaptor and indices was purified with  
592 Agencourt® AMPure® XP magnetic beads (Beckman Coulter) using beads/sample volume  
593 ratio of 0.8. Purified amplicons were then normalised at 4 nM according to expected size and  
594 measured DNA concentrations (Qubit™ dsDNA HS Assay Kit). Amplicons with different indices  
595 were pooled and the sequencing library was diluted to 15 pM with 10% *phiX* control spike and  
596 sequenced on Illumina Miseq or Nextseq using Reagent Kit v3 to produce 300 bp or 150 bp  
597 paired-end reads. Sequencing reads of RM-seq experiments are available from NCBI/ENA/DDBJ  
598 under BioProject number PRJNA399605.

599

#### 600 **Bioinformatics analysis pipeline.**

601 The RM-seq pipeline processes raw reads after demultiplexing by the Illumina sequencing  
602 instrument. The pipeline uses *bwa mem* read aligner (0.7.15-r1140) (Li 2013) to map reads to  
603 a reference locus (*rpoB*) and *samtools* (v1.3) (Li et al. 2009) to remove unmapped and low  
604 quality reads from the read sets. Then *pear* (v0.9.10) (Zhang et al. 2014) is used to merge paired  
605 reads. Merged reads sharing identical barcodes are aligned using *Clustal Omega* (v1.2.1)  
606 (Sievers and Higgins 2014). Cons from the EMBOSS suite (v6.6.0.0) (Rice et al. 2000) is used to  
607 collapse the alignments into single error-corrected consensus reads. To speed-up processing,  
608 read alignment and consensus sequence generation tasks are executed in parallel using *GNU*  
609 *parallel* (Tange 2011). Unique consensus DNA sequences are identified via clustering using the  
610 *cd-hit-est* module of the *CD-HIT* (v4.7) software (Fu et al. 2012). Resultant unique representative  
611 consensus sequences are translated to amino acids using *getorf* and annotated at the protein  
612 and nucleotide level using *diffseq*, both modules of the EMBOSS suite. The annotated effect of  
613 mutation is then re-associated to each barcode in the final output table.

614 **Construction of *rpoB* mutants by allelic exchange.**

615 Allelic exchange experiments were performed using shuttle vector pIMAY-Z (Monk et al. 2015)  
616 with some modifications. Full-length *rpoB* sequences corresponding to the 19 different *rpoB*  
617 alleles reconstructed by allelic exchange in the *S. aureus* NRS384 strain were obtained by  
618 performing PCR overlap extension with Phusion High-Fidelity DNA Polymerase (New England  
619 Biolabs) and introducing *rpoB* codon mutations to the primer tails  
620 (Supplemental\_Table\_S3.pdf). Gel purified *rpoB* amplicons were then joined with pIMAY-Z using  
621 Seamless Ligation Cloning Extract (SLiCE) cloning (Zhang et al. 2012) and transformed into *E.*  
622 *coli* strain IM08B (Monk et al. 2015) to allow CC8-like methylation of the plasmid and bypass  
623 the *S. aureus* restriction barrier. The presence of a cloned *rpoB* insert in pIMAY-Z plasmid was  
624 then confirmed by colony PCR using primers pIMAY-Z-MCSF and pIMAY-Z-MCSR. Purified  
625 plasmid was then electroporated into *S. aureus* and plated on HI supplemented with  
626 chloramphenicol at 10 mg/L and X-gal (5-bromo-4-chloro-3-indolyl- $\beta$ -d-galactopyranoside;  
627 Melford) at 100 mg/L and grown 48h at 30°C. Blue colonies were picked and grown in HI broth  
628 at 37°C without Cm selection pressure overnight to allow loss of the pIMAY-Z thermosensitive  
629 plasmid. Double cross-overs leading to allelic replacement of the wild type with the desired  
630 rifampicin resistant *rpoB* alleles were directly selected by plating cultures on HI plates  
631 supplemented with 0.06 mg/L of rifampicin. Rifampicin resistant and chloramphenicol  
632 sensitive colonies arising at a frequency higher than  $10^{-3}$  were considered as potentially positive  
633 clones for allelic exchange as spontaneous rifampicin resistance arises at a much lower  
634 frequency of  $\sim 2 \times 10^{-8}$  (O'Neill et al. 2001) in the wild type strain. Clones were then colony  
635 purified on HI plates before glycerol storage and extraction of genomic DNA. To validate the  
636 allelic exchange procedure, the whole genome sequence of all reconstructed strains was  
637 determined with the Illumina Miseq or Nextseq 500 platforms, using Nextera XT paired-end  
638 libraries (2x300 bp or 2x150 bp respectively). To ensure that no additional mutations were  
639 introduced during the allelic exchange procedure, reads of all mutant strains were mapped to



640 the reference NRS384 genome (Monk et al. 2015) using Snippy (v 2.9)  
641 (<https://github.com/tseemann/snippy>). The results of the SNP/indel calling of the  
642 reconstructed mutants were then compared with our NRS384 WT reference isolate. The  
643 SNP/indel profile for each mutant is presented in Supplemental\_Table\_S1.pdf.

644

#### 645 **Antibiotic susceptibility testing and time kill assays.**

646 Rifampicin and daptomycin MIC were measured using E-tests (BioMérieux) on Mueller-Hinton  
647 plates supplemented with 50 mg/L Ca<sup>2+</sup> following manufacturer's instructions. For daptomycin  
648 time kill assays, 10 mL of BHI broth supplemented with 8mg/L daptomycin and 50 mg/L Ca<sup>2+</sup>  
649 was inoculated with 10<sup>6</sup> CFU/mL of an overnight culture. Cultures were incubated at 37°C with  
650 constant shaking and samples were collected at 3 hr, 6 hr and 24 hr time points. Cell survival  
651 after daptomycin exposure was assessed by calculating the ratio of the CFU at 3, 6 and 24 hours  
652 on the CFU of the initial inoculum (10<sup>6</sup> CFU/mL) and taking the average colony counts of  
653 duplicate BHI agar plates. All daptomycin time kill assays were performed in biological  
654 triplicate.

655

#### 656 **Mutant differential abundance analysis after daptomycin selection.**

657 Three replicates of daptomycin selection were performed on a rifampicin selected population  
658 (*in vitro* 1 population selected with rifampicin at 0.06 mg/L). A high initial inoculum of 5x10<sup>8</sup>  
659 CFU/mL was used to recover a sufficient amount of bacterial DNA from surviving cells after  
660 daptomycin exposure. After 3 hours or 24 hours of exposure to daptomycin at 8 mg/L, surviving  
661 bacterial populations were pelleted and washed. To remove extracellular DNA resulting from  
662 daptomycin induced cell death, cell pellets were incubated 45 min at 37°C with 1 µL of  
663 Amplification Grade DNase I (1U/µL Invitrogen) in 5 µL of 10X DNase I reaction buffer and 44  
664 µL laboratory grade H<sub>2</sub>O. Then DNase I was inactivated with 5 µL of 25 mM EDTA (pH 8.0) and  
665 10 min incubation at 65°C. Genomic DNA was extracted and *rpoB* mutant abundance was

666 assessed by RM-seq as described above. Differential abundance analysis of the mutant before  
667 and after daptomycin exposure was performed with the R DESeq2 (1.10.1) package (Love et al.  
668 2014), using the count of mutation calculated from table output of the RM-seq data processing  
669 pipeline. DESeq2 analysis was performed with all mutations count superior to 1 using default  
670 parameters and Cooks cut-off set to false. The Wald statistical test performed by DESeq2 to  
671 estimate the significance of the changes in mutation abundance after exposure to daptomycin  
672 was used to screen *rpoB* mutations that were associated with increased or decreased tolerance  
673 to daptomycin. The detailed explanation of this test is described in (Love et al. 2014). Wald test  
674 P values were adjusted for multiple testing using the procedure of Benjamini and Hochberg  
675 (Benjamini and Hochberg 1995).

676

#### 677 **Mouse infection model.**

678 Wild-type 6-week-old female BALB/c mice were injected via the tail vein with approximately 2  
679  $\times 10^6$  colony-forming units (CFU) in a volume of 100  $\mu$ L PBS. The mice were monitored every 8  
680 hours until completion of the experiment and were euthanized after 1 day or 7 days post  
681 infection. Bacteria from the liver, kidney and spleen were recovered by mechanical  
682 homogenization in 1 mL of phosphate buffered saline (PBS), serially diluted and plated on BHI  
683 plates. Colonies forming after overnight incubation at 37°C were pooled and assessed by RM-  
684 seq. All experiments were performed in accordance with protocols approved by the animal  
685 ethics and welfare committee of the University of Melbourne (approval number 1212591).

686 **DATA ACCESS**

687 Sequencing reads are available from NCBI/ENA/DDBJ under BioProject numbers PRJNA360176  
688 and PRJNA399605. The RM-seq bioinformatics pipeline is available from Github  
689 (<https://github.com/rguerillot/RM-seq>).

690

691 **ACKNOWLEDGMENTS**

692 This work was supported by the National Health and Medical Research Council (NHMRC),  
693 Australia project grant (GNT1066791) and Research Fellowship to TPS (GNT1008549) and  
694 Practitioner Fellowship to BPH (GNT1105905). Doherty Applied Microbial Genomics is funded  
695 by the Department of Microbiology and Immunology at The University of Melbourne.

696

697 **AUTHOR CONTRIBUTIONS**

698 RG, TPS and BPH designed and planned the project. RG, LL, SB, BH, WG, AD and TT designed and  
699 performed the laboratory experiments. RG, TT, IM, SP, SG, AG, MBS, AYP, TPS and BPH provided  
700 intellectual input and analysed the data. The manuscript was drafted by RG, TPS and BPH. All  
701 authors reviewed and contributed to the final manuscript.

702

703 **DISCLOSURE DECLARATION**

704 None to declare

705

706 **SUPPLEMENTAL MATERIAL**

707 *Supplemental\_Fig\_S1: 3D model of S. aureus RpoB in complex with rifampicin. Rifampicin*  
708 *molecule is coloured in red. The RpoB residue surface a distance of less than 10Å are coloured in*  
709 *white, residues associated with rifampicin resistance by RM-seq are coloured in orange. S. aureus*

710 *NRS384 WT RpoB protein structure was modelled on the Swiss-model server*  
711 *(<https://swissmodel.expasy.org>) using Escherichia coli RNA polymerase and rifampicin complex*  
712 *structure (5UAC). The structure model was visualised using PyMOL software.*

713 ***Supplemental\_Fig\_S2: Prediction of the number of consensus reads at different sequencing***  
714 ***depths.***

715 ***Supplemental\_Table\_S1: Whole genome sequencing and SNP/indel calling of reconstructed rpoB***  
716 ***mutants.***

717 ***Supplemental\_Table\_S2: Rifampicin and daptomycin MICs of reconstructed mutants.***

718 ***Supplemental\_Table\_S3: Primers sequences used for mutations reconstruction and RM-seq.***

719 **REFERENCES**

- 720 Aiba Y, Katayama Y, Hishinuma T, Murakami-Kuroda H, Cui L, Hiramatsu K. 2013. Mutation of  
721 RNA polymerase  $\beta$ -subunit gene promotes heterogeneous-to-homogeneous conversion of  
722  $\beta$ -lactam resistance in methicillin-resistant *Staphylococcus aureus*. *Antimicrob Agents*  
723 *Chemother* **57**: 4861–71.
- 724 Bæk KT, Thøgersen L, Mogenssen RG, Møllergaard M, Thomsen LE, Petersen A, Skov S, Cameron  
725 DR, Peleg AY, Frees D. 2015. Stepwise decrease in daptomycin susceptibility in clinical  
726 *Staphylococcus aureus* isolates associated with an initial mutation in *rpoB* and a  
727 compensatory inactivation of the *clpX* gene. *Antimicrob Agents Chemother* **59**: 6983–91.
- 728 Barbosa C, Trebosc V, Kemmer C, Rosenstiel P, Beardmore R, Schulenburg H, Jansen G. 2017.  
729 Alternative evolutionary paths to bacterial antibiotic resistance cause distinct collateral  
730 effects. *Mol Biol Evol* 1–43.
- 731 Beceiro A, Tomás M, Bou G. 2012. Antimicrobial resistance and virulence: a beneficial  
732 relationship for the microbial world? *Enferm Infecc Microbiol Clin* **30**: 492–9.
- 733 Beceiro A, Tomás M, Bou G. 2013. Antimicrobial resistance and virulence: a successful or  
734 deleterious association in the bacterial world? *Clin Microbiol Rev* **26**: 185–230.
- 735 Benjamini Y, Hochberg Y. 1995. Controlling the false discovery rate: a practical and powerful  
736 approach to multiple testing. *J R Stat Soc B* **57**: 289–300.
- 737 Berti AD, Baines SL, Howden BP, Sakoulas G, Nizet V, Proctor RA, Rose WE. 2015. Heterogeneity  
738 of genetic pathways toward daptomycin nonsusceptibility in *Staphylococcus aureus*  
739 determined by adjunctive antibiotics. *Antimicrob Agents Chemother* **59**: 2799–806.
- 740 Cameron DR, Howden BP, Peleg AY. 2011. The interface between antibiotic resistance and  
741 virulence in *Staphylococcus aureus* and its impact upon clinical outcomes. *Clin Infect Dis* **53**:  
742 576–82.
- 743 Chen CJ, Lin MH, Shu JC, Lu JJ. 2014. Reduced susceptibility to vancomycin in isogenic

- 744 *Staphylococcus aureus* strains of sequence type 59: Tracking evolution and identifying  
745 mutations by whole-genome sequencing. *J Antimicrob Chemother* **69**: 349–354.
- 746 CLSI . Performance standards for antimicrobial susceptibility testing. 2016. *CLSI supplement*  
747 *M100S*.
- 748 Cui L, Isii T, Fukuda M, Ochiai T, Neoh HM, Da Cunha Camargo ILB, Watanabe Y, Shoji M,  
749 Hishinuma T, Hiramatsu K. 2010. An RpoB mutation confers dual heteroresistance to  
750 daptomycin and vancomycin in *Staphylococcus aureus*. *Antimicrob Agents Chemother* **54**:  
751 5222–5233.
- 752 de Man TJB, Limbago BM. 2016. SSTAR, a Stand-Alone Easy-To-Use Antimicrobial Resistance  
753 Gene Predictor. *mSphere* **1**.
- 754 Donnabella V, Martiniuk F, Kinney D, Bacerdo M, Bonk S, Hanna B, Rom WN. 1994. Isolation of  
755 the gene for the beta subunit of RNA polymerase from rifampicin-resistant *Mycobacterium*  
756 *tuberculosis* and identification of new mutations. *Am J Respir Cell Mol Biol* **11**: 639–643.
- 757 Eilertson B, Maruri F, Blackman A, Herrera M, Samuels DC, Sterling TR. 2014. High proportion  
758 of heteroresistance in *gyrA* and *gyrB* in fluoroquinolone-resistant *Mycobacterium*  
759 *tuberculosis* clinical isolates. *Antimicrob Agents Chemother* **58**: 3270–3275.
- 760 EUCAST. 2015. Antimicrobial susceptibility testing for bacteria. *EUCAST*.  
761 [http://www.eucast.org/ast\\_of\\_bacteria/](http://www.eucast.org/ast_of_bacteria/).
- 762 Faith JJ, Guruge JL, Charbonneau M, Subramanian S, Seedorf H, Goodman AL, Clemente JC, Knight  
763 R, Heath AC, Leibel RL, et al. 2013. The long-term stability of the human gut microbiota.  
764 *Science* **341**: 1237439.
- 765 Feng J, Lupien A, Gingras H, Wasserscheid J, Dewar K, Légaré D, Ouellette M. 2009. Genome  
766 sequencing of linezolid-resistant *Streptococcus pneumoniae* mutants reveals novel  
767 mechanisms of resistance. *Genome Res* **19**: 1214–1223.
- 768 Forrest GN, Tamura K. 2010. Rifampin combination therapy for nonmycobacterial infections.  
769 *Clin Microbiol Rev* **23**: 14–34.

- 770 Fu L, Niu B, Zhu Z, Wu S, Li W. 2012. CD-HIT: Accelerated for clustering the next-generation  
771 sequencing data. *Bioinformatics* **28**: 3150–3152.
- 772 Gao W, Cameron DR, Davies JK, Kostoulias X, Stepnell J, Tuck KL, Yeaman MR, Peleg AY, Stinear  
773 TP, Howden BP. 2013. The RpoB H<sub>481</sub>Y rifampicin resistance mutation and an active  
774 stringent response reduce virulence and increase resistance to innate immune responses  
775 in *Staphylococcus aureus*. *J Infect Dis* **207**: 929–39.
- 776 Gao W, Chua K, Davies JK, Newton HJ, Seemann T, Harrison PF, Holmes NE, Rhee H-W, Hong J-I,  
777 Hartland EL, et al. 2010. Two novel point mutations in clinical *Staphylococcus aureus*  
778 reduce linezolid susceptibility and switch on the stringent response to promote persistent  
779 infection. *PLoS Pathog* **6**: e1000944.
- 780 Garrigós C, Murillo O, Euba G, Verdaguer R, Tubau F, Cabellos C, Cabo J, Ariza J. 2010. Efficacy of  
781 usual and high doses of daptomycin in combination with rifampin versus alternative  
782 therapies in experimental foreign-body infection by methicillin-resistant *Staphylococcus*  
783 *aureus*. *Antimicrob Agents Chemother* **54**: 5251–5256.
- 784 Guérillot R, Gonçalves da Silva A, Monk I, Giulieri S, Tomita T, Alison E, Porter J, Pidot S, Gao W,  
785 Peleg AY, et al. 2018. Convergent Evolution Driven by Rifampin Exacerbates the Global  
786 Burden of Drug-Resistant *Staphylococcus aureus* ed. P.D. Fey. *mSphere* **3**.
- 787 Händel N, Schuurmans JM, Feng Y, Brul S, Ter Kuile BH. 2014. Interaction between mutations  
788 and regulation of gene expression during development of de novo antibiotic resistance.  
789 *Antimicrob Agents Chemother* **58**: 4371–4379.
- 790 Helms M, Simonsen J, Mølbak K. 2004. Quinolone Resistance Is Associated with Increased Risk  
791 of Invasive Illness or Death during Infection with *Salmonella* Serotype Typhimurium. *J*  
792 *Infect Dis* **190**: 1652–1654.
- 793 Hershberg R. 2017. Antibiotic-Independent Adaptive Effects of Antibiotic Resistance Mutations.  
794 *Trends Genet* **33**: 521–528.
- 795 Holmes NE, Turnidge JD, Munckhof WJ, Robinson JO, Korman TM, O’Sullivan MVN, Anderson TL,

- 796 Roberts SA, Gao W, Christiansen KJ, et al. 2011. Antibiotic choice may not explain poorer  
797 outcomes in patients with *Staphylococcus aureus* bacteremia and high vancomycin  
798 minimum inhibitory concentrations. *J Infect Dis* **204**: 340–347.
- 799 Howden BP, Davies JK, Johnson PDR, Stinear TP, Grayson ML. 2010. Reduced vancomycin  
800 susceptibility in *Staphylococcus aureus*, including vancomycin-intermediate and  
801 heterogeneous vancomycin-intermediate strains: Resistance mechanisms, laboratory  
802 detection, and clinical implications. *Clin Microbiol Rev* **23**: 99–139.
- 803 Howden BP, Peleg AY, Stinear TP. 2014. The evolution of vancomycin intermediate  
804 *Staphylococcus aureus* (VISA) and heterogenous-VISA. *Infect Genet Evol* **21**: 575–582.
- 805 Imamovic L, Sommer MOA. 2013. Use of Collateral Sensitivity Networks to Design Drug Cycling  
806 Protocols That Avoid Resistance Development. *Sci Transl Med* **5**: 204ra132-204ra132.
- 807 Jugheli L, Bzekalava N, de Rijk P, Fissette K, Portaels F, Rigouts L. 2009. High level of cross-  
808 resistance between kanamycin, amikacin, and capreomycin among *Mycobacterium*  
809 *tuberculosis* isolates from Georgia and a close relation with mutations in the *rrs* gene.  
810 *Antimicrob Agents Chemother* **53**: 5064–8.
- 811 Kivioja T, Vähärautio A, Karlsson K, Bonke M, Enge M, Linnarsson S, Taipale J. 2011. Counting  
812 absolute numbers of molecules using unique molecular identifiers. *Nat Methods* **9**: 72–74.
- 813 Köser CU, Ellington MJ, Peacock SJ. 2014. Whole-genome sequencing to control antimicrobial  
814 resistance. *Trends Genet* **30**: 401–407.
- 815 Li H. 2013. Aligning sequence reads, clone sequences and assembly contigs with BWA-MEM.  
816 *arXiv Prepr arXiv* **0**: 3.
- 817 Li H, Handsaker B, Wysoker A, Fennell T, Ruan J, Homer N, Marth G, Abecasis G, Durbin R. 2009.  
818 The Sequence Alignment/Map format and SAMtools. *Bioinformatics* **25**: 2078–2079.
- 819 Liu B, Pop M. 2009. ARDB - Antibiotic resistance genes database. *Nucleic Acids Res* **37**.
- 820 Livermore DM, Warner M, Jamrozny D, Mushtaq S, Nichols WW, Mustafa N, Woodford N. 2015. In  
821 vitro selection of ceftazidime-avibactam resistance in enterobacteriaceae with KPC-3



- 822 carbapenemase. *Antimicrob Agents Chemother* **59**: 5324–5330.
- 823 Love MI, Huber W, Anders S, Lönnstedt I, Speed T, Robinson M, Smyth G, McCarthy D, Chen Y,  
824 Smyth G, et al. 2014. Moderated estimation of fold change and dispersion for RNA-seq data  
825 with DESeq2. *Genome Biol* **15**: 550.
- 826 McArthur AG, Waglechner N, Nizam F, Yan A, Azad MA, Baylay AJ, Bhullar K, Canova MJ, De  
827 Pascale G, Ejim L, et al. 2013. The comprehensive antibiotic resistance database. *Antimicrob*  
828 *Agents Chemother* **57**: 3348–3357.
- 829 McVicker G, Prajsnar TK, Williams A, Wagner NL, Boots M, Renshaw SA, Foster SJ, Thwaites G,  
830 Edgeworth J, Gkrania-Klotsas E, et al. 2014. Clonal Expansion during *Staphylococcus aureus*  
831 Infection Dynamics Reveals the Effect of Antibiotic Intervention ed. A. Peschel. *PLoS Pathog*  
832 **10**: e1003959.
- 833 Meumann EM, Globan M, Fyfe JAM, Leslie D, Porter JL, Seemann T, Denholm J, Stinear TP. 2015.  
834 Genome sequence comparisons of serial multi-drug-resistant *Mycobacterium tuberculosis*  
835 isolates over 21 years of infection in a single patient. *Microb genomics* **1**: e000037.
- 836 Miskinyte M, Gordo I. 2013. Increased survival of antibiotic-resistant *Escherichia coli* inside  
837 macrophages. *Antimicrob Agents Chemother* **57**: 189–195.
- 838 Monk IR, Tree JJ, Howden BP, Stinear TP, Foster TJ. 2015. Complete Bypass of Restriction  
839 Systems for Major *Staphylococcus aureus* Lineages. *MBio* **6**: e00308-15.
- 840 Mwangi MM, Wu SW, Zhou Y, Sieradzki K, de Lencastre H, Richardson P, Bruce D, Rubin E, Myers  
841 E, Siggia ED, et al. 2007. Tracking the in vivo evolution of multidrug resistance in  
842 *Staphylococcus aureus* by whole-genome sequencing. *Proc Natl Acad Sci U S A* **104**: 9451–  
843 9456.
- 844 O'Neill a J, Cove JH, Chopra I. 2001. Mutation frequencies for resistance to fusidic acid and  
845 rifampicin in *Staphylococcus aureus*. *J Antimicrob Chemother* **47**: 647–650.
- 846 Pál C, Papp B, Lázár V. 2015. Collateral sensitivity of antibiotic-resistant microbes. *Trends*  
847 *Microbiol* **23**: 401–407.

- 848 Pozzi G, Meloni M, Iona E, Orrù G, Thoresen OF, Ricci ML, Oggioni MR, Fattorini L, Orefici G. 1999.  
849 *rpoB* Mutations in multidrug-resistant strains of *Mycobacterium tuberculosis* isolated in  
850 Italy. *J Clin Microbiol* **37**: 1197–1199.
- 851 Ramaswamy S V, Dou S, Rendon A, Yang Z, Cave MD, Graviss EA. 2004. Genotypic analysis of  
852 multidrug-resistant *Mycobacterium tuberculosis* isolates from Monterrey, Mexico. *J Med*  
853 *Microbiol* **53**: 107–113.
- 854 Reiber C, Senn O, Muller D, Kullak-Ublick G, Corti N. 2015. Therapeutic drug monitoring of  
855 daptomycin: A retrospective monocentric analysis. *Ther Drug Monit* **37**: 634–640.
- 856 Rice P, Longden I, Bleasby A. 2000. EMBOSS: The European Molecular Biology Open Software  
857 Suite. *Trends Genet* **16**: 276–277.
- 858 Rodriguez De Evgrafov M, Gumpert H, Munck C, Thomsen TT, Sommer MOA. 2015. Collateral  
859 resistance and sensitivity modulate evolution of high-level resistance to drug combination  
860 treatment in *Staphylococcus aureus*. *Mol Biol Evol* **32**: 1175–1185.
- 861 Sacco E, Cortes M, Josseaume N, Bouchier C, Dubée V, Hugonnet J-E, Mainardi J-L, Rice LB, Arthur  
862 M. 2015. Mutation landscape of acquired cross-resistance to glycopeptide and  $\beta$ -lactam  
863 antibiotics in *Enterococcus faecium*. *Antimicrob Agents Chemother* **59**: 5306–15.
- 864 Saleh-Mghir A, Muller-Serieys C, Dinh A, Massias L, Crémieux AC. 2011. Adjunctive rifampin is  
865 crucial to optimizing daptomycin efficacy against rabbit prosthetic joint infection due to  
866 methicillin-resistant *S. aureus*. *Antimicrob Agents Chemother* **55**: 4589–4593.
- 867 Schirmer M, Ijaz UZ, D'Amore R, Hall N, Sloan WT, Quince C. 2015. Insight into biases and  
868 sequencing errors for amplicon sequencing with the Illumina MiSeq platform. *Nucleic Acids*  
869 *Res* **43**: e37.
- 870 Schürch AC, van Schaik W. 2017. Challenges and opportunities for whole-genome sequencing  
871 based surveillance of antibiotic resistance. *Ann N Y Acad Sci* **1388**: 108–120.
- 872 Sievers F, Higgins DG. 2014. Clustal Omega. *Curr Protoc Bioinforma* **2014**: 3.13.1-3.13.16.
- 873 Smani Y, López-Rojas R, Domínguez-Herrera J, Docobo-Pérez F, Martí S, Vila J, Pachón J. 2012. In

- 874 vitro and in vivo reduced fitness and virulence in ciprofloxacin-resistant *Acinetobacter*  
875 *baumannii*. *Clin Microbiol Infect* **18**.
- 876 Smith T, Wolff KA, Nguyen L. 2013. Molecular biology of drug resistance in *Mycobacterium*  
877 *tuberculosis*. *Curr Top Microbiol Immunol* **374**: 53–80.
- 878 Tange O. 2011. GNU Parallel: the command-line power tool. *login USENIX Mag* **36**: 42–47.
- 879 Van Belkum A, Dunne WM. 2013. Next-generation antimicrobial susceptibility testing. *J Clin*  
880 *Microbiol* **51**: 2018–2024.
- 881 Whale AS, Bushell CA, Grant PR, Cowen S, Gutierrez-Aguirre I, O'Sullivan DM, Žel J, Milavec M,  
882 Foy CA, Nastouli E, et al. 2016. Detection of rare drug resistance mutations by digital PCR  
883 in a human influenza A virus model system and clinical samples. *J Clin Microbiol* **54**: 392.
- 884 World Health Organization. 2014. *Antimicrobial resistance: global report on surveillance 2014*.
- 885 Yu J, Wu J, Francis KP, Purchio TF, Kadurugamuwa JL. 2005. Monitoring in vivo fitness of  
886 rifampicin-resistant *Staphylococcus aureus* mutants in a mouse biofilm infection model. *J*  
887 *Antimicrob Chemother* **55**: 528–34.
- 888 Zetola NM, Shin SS, Tumedi KA, Moeti K, Ncube R, Nicol M, Collman RG, Klausner JD, Modongoa  
889 C. 2014. Mixed *Mycobacterium tuberculosis* complex infections and false-negative results  
890 for rifampin resistance by genexpert MTB/RIF are associated with poor clinical outcomes.  
891 *J Clin Microbiol* **52**: 2422–2429.
- 892 Zhang J, Kobert K, Flouri T, Stamatakis A. 2014. PEAR: A fast and accurate Illumina Paired-End  
893 reAd mergeR. *Bioinformatics* **30**: 614–620.
- 894 Zhang Y, Werling U, Edelmann W. 2012. SLiCE: A novel bacterial cell extract-based DNA cloning  
895 method. *Nucleic Acids Res* **40**:e55.
- 896
